# Supplementary material for: Effect of Plant Growth Promoting Microorganisms on Pepper Plants Infected with Tomato Brown Rugose Fruit Virus
Source: MDPI journal article supplement (doi:10.3390/d14080635), 2022-08-10
Supplement: s1 [file s1]

**Table S1.** Complete results from real-time qPCR assay

| <b>Sample name</b> | <b>Sample type</b> | <b>Mean Ct</b> | <b>Std.Dev. Ct</b> |
|--------------------|--------------------|----------------|--------------------|
| P01                | Unknown            | 12.37          | 0.28               |
| P02                | Unknown            | 13.6           | 0.38               |
| P03                | Unknown            | 13.62          | 0.29               |
| P04                | Unknown            | 13.26          | 0.21               |
| P05                | Unknown            | 14.14          | 0.26               |
| PAA1               | Unknown            | 12.41          | 0.36               |
| PAA2               | Unknown            | 17.9           | 0.38               |
| PAA3               | Unknown            | 14.38          | 0.19               |
| PAA4               | Unknown            | 12.55          | 0.21               |
| PAA5               | Unknown            | 13.34          | 0.08               |
| PAzo1              | Unknown            | 15.67          | 0.31               |
| PAzo2              | Unknown            | 16.22          | 0.12               |
| PAzo3              | Unknown            | 13.09          | 0.26               |
| PAzo4              | Unknown            | 14.25          | 0.15               |
| PAzo5              | Unknown            | 27.14          | 0.14               |
| PAMF1              | Unknown            | 13.16          | 0.14               |
| PAMF2              | Unknown            | 12.13          | 0.13               |
| PAMF3              | Unknown            | 12.96          | 0.26               |
| PAMF4              | Unknown            | 15.62          | 0.37               |
| PAMF5              | Unknown            | 12.82          | 0.15               |
| N-0                | Unknown            | 33.95          | 0.39               |
| N-AA               | Unknown            | 32.86          | 0.14               |
| N-AZO              | Unknown            | 33.07          | 0.39               |
| N-AMF              | Unknown            | 32.23          | 0.15               |
| T-P                | Positive control   | 14.56          | 0.46               |
| NTC                | NTC                | no Ct          |                    |

Explanatory notes: P01-5: plants inoculated with ToBRFV, no AMF or Azospirillum treatment; PAA1-5: plants inoculated with ToBRFV, treated with both AMF and Azospirillum; PAzo1-5: plants inoculated with ToBRFV, treated with Azospirillum; PAMF1-5: plants inoculated with ToBRFV, treated with AMF; N-0, N-AA, N-AZO, N-AMF: non-inoculated plants with ToBRFV, without treatment, treated with both AMF and Azospirillum, Azospirillum, AMF, respectively.

**Table S2.** Results of relative quantification of ToBRFV titre in plant samples.

| Gene      | Sample name | No. of replicates | Mean Ct | Mean calib. Ct | Std.Dev. mean calib. Ct | RQ       | Std. Dev. RQ | Norm. expression | Std.Dev.norm. expression |
|-----------|-------------|-------------------|---------|----------------|-------------------------|----------|--------------|------------------|--------------------------|
| CP-MP-FAM | calibration | 3                 | 14.12   | 14.12          | 0.46                    | 1        | 0.32         | 1                | 0.38                     |
| CP-MP-FAM | NA          | 3                 | 32.43   | 32.43          | 0.1                     | 3.08E-06 | 2.2E-07      | 0.00000191       | 4.14E-07                 |
| CP-MP-FAM | NAMF        | 3                 | 31.86   | 31.86          | 0.22                    | 4.56E-06 | 0.0000007    | 0.0000049        | 2.01E-06                 |
| CP-MP-FAM | NAZO        | 3                 | 32.71   | 32.71          | 0.42                    | 2.53E-06 | 7.29E-07     | 0.00000248       | 9.01E-07                 |
| CP-MP-FAM | NO          | 3                 | 33.55   | 33.55          | 0.36                    | 1.41E-06 | 3.55E-07     | 0.000000555      | 1.51E-07                 |
| CP-MP-FAM | PAA1        | 3                 | 12.01   | 12.01          | 0.35                    | 4.34     | 1.05         | 2.69             | 1.09                     |
| CP-MP-FAM | PAA2        | 3                 | 17.49   | 17.49          | 0.4                     | 0.1      | 0.03         | 0.04             | 0.02                     |
| CP-MP-FAM | PAA3        | 3                 | 14      | 14             | 0.22                    | 1.09     | 0.17         | 0.36             | 0.1                      |
| CP-MP-FAM | PAA4        | 3                 | 12.18   | 12.18          | 0.17                    | 3.85     | 0.45         | 1.98             | 0.48                     |
| CP-MP-FAM | PAA5        | 3                 | 12.98   | 12.98          | 0.08                    | 2.2      | 0.13         | 1.12             | 0.2                      |
| CP-MP-FAM | PAMF1       | 3                 | 12.74   | 12.74          | 0.21                    | 2.61     | 0.37         | 2.68             | 0.69                     |
| CP-MP-FAM | PAMF2       | 3                 | 11.71   | 11.71          | 0.18                    | 5.32     | 0.67         | 5.09             | 0.93                     |
| CP-MP-FAM | PAMF3       | 3                 | 12.56   | 12.56          | 0.3                     | 2.97     | 0.62         | 1.89             | 0.65                     |
| CP-MP-FAM | PAMF4       | 3                 | 15.2    | 15.2           | 0.32                    | 0.47     | 0.11         | 0.15             | 0.04                     |
| CP-MP-FAM | PAMF5       | 3                 | 12.39   | 12.39          | 0.12                    | 3.32     | 0.28         | 1.6              | 0.65                     |
| CP-MP-FAM | PAZO1       | 3                 | 15.24   | 15.24          | 0.26                    | 0.46     | 0.08         | 0.18             | 0.05                     |
| CP-MP-FAM | PAZO2       | 3                 | 15.81   | 15.81          | 0.17                    | 0.31     | 0.04         | 0.14             | 0.05                     |
| CP-MP-FAM | PAZO3       | 3                 | 12.69   | 12.69          | 0.29                    | 2.7      | 0.55         | 1.93             | 0.66                     |
| CP-MP-FAM | PAZO4       | 3                 | 13.87   | 13.87          | 0.21                    | 1.19     | 0.18         | 1.03             | 0.18                     |
| CP-MP-FAM | PAZO5       | 3                 | 26.67   | 26.67          | 0.19                    | 0.000166 | 0.000022     | 0.0000744        | 0.0000107                |
| CP-MP-FAM | PO1         | 3                 | 11.97   | 11.97          | 0.29                    | 4.46     | 0.88         | 2.35             | 0.72                     |
| CP-MP-FAM | PO2         | 3                 | 13.17   | 13.17          | 0.37                    | 1.94     | 0.5          | 0.82             | 0.22                     |
| CP-MP-FAM | PO3         | 3                 | 13.21   | 13.21          | 0.25                    | 1.88     | 0.32         | 0.75             | 0.18                     |
| CP-MP-FAM | PO4         | 3                 | 12.86   | 12.86          | 0.25                    | 2.4      | 0.41         | 0.73             | 0.24                     |

|           |             |   |       |       |      |      |      |     |      |
|-----------|-------------|---|-------|-------|------|------|------|-----|------|
| CP-MP-FAM | PO5         | 3 | 13.75 | 13.75 | 0.31 | 1.3  | 0.28 | 0.5 | 0.11 |
| [18S-Cy5] | calibration | 3 | 19.38 | 19.38 | 0.31 | 1    | 0.22 |     |      |
| [18S-Cy5] | NA          | 3 | 18.69 | 18.69 | 0.29 | 1.61 | 0.33 |     |      |
| [18S-Cy5] | NAMF        | 3 | 19.48 | 19.48 | 0.55 | 0.93 | 0.36 |     |      |
| [18S-Cy5] | NAZO        | 3 | 19.35 | 19.35 | 0.32 | 1.02 | 0.22 |     |      |
| [18S-Cy5] | NO          | 3 | 18.02 | 18.02 | 0.16 | 2.55 | 0.28 |     |      |
| [18S-Cy5] | PAA1        | 3 | 18.69 | 18.69 | 0.47 | 1.61 | 0.52 |     |      |
| [18S-Cy5] | PAA2        | 3 | 18.09 | 18.09 | 0.46 | 2.44 | 0.78 |     |      |
| [18S-Cy5] | PAA3        | 3 | 17.77 | 17.77 | 0.36 | 3.04 | 0.76 |     |      |
| [18S-Cy5] | PAA4        | 3 | 18.42 | 18.42 | 0.31 | 1.94 | 0.41 |     |      |
| [18S-Cy5] | PAA5        | 3 | 18.4  | 18.4  | 0.24 | 1.97 | 0.32 |     |      |
| [18S-Cy5] | PAMF1       | 3 | 19.41 | 19.41 | 0.31 | 0.98 | 0.21 |     |      |
| [18S-Cy5] | PAMF2       | 3 | 19.31 | 19.31 | 0.19 | 1.04 | 0.14 |     |      |
| [18S-Cy5] | PAMF3       | 3 | 18.72 | 18.72 | 0.39 | 1.57 | 0.43 |     |      |
| [18S-Cy5] | PAMF4       | 3 | 17.68 | 17.68 | 0.3  | 3.24 | 0.67 |     |      |
| [18S-Cy5] | PAMF5       | 3 | 18.32 | 18.32 | 0.58 | 2.08 | 0.83 |     |      |
| [18S-Cy5] | PAZO1       | 3 | 18.06 | 18.06 | 0.33 | 2.49 | 0.57 |     |      |
| [18S-Cy5] | PAZO2       | 3 | 18.21 | 18.21 | 0.51 | 2.24 | 0.8  |     |      |
| [18S-Cy5] | PAZO3       | 3 | 18.89 | 18.89 | 0.4  | 1.4  | 0.39 |     |      |
| [18S-Cy5] | PAZO4       | 3 | 19.16 | 19.16 | 0.14 | 1.16 | 0.11 |     |      |
| [18S-Cy5] | PAZO5       | 3 | 18.21 | 18.21 | 0.08 | 2.24 | 0.13 |     |      |
| [18S-Cy5] | PO1         | 3 | 18.45 | 18.45 | 0.34 | 1.9  | 0.45 |     |      |
| [18S-Cy5] | PO3         | 3 | 18.05 | 18.05 | 0.25 | 2.5  | 0.44 |     |      |
| [18S-Cy5] | PO4         | 3 | 17.65 | 17.65 | 0.41 | 3.31 | 0.93 |     |      |
| [18S-Cy5] | PO5         | 3 | 17.99 | 17.99 | 0.1  | 2.62 | 0.19 |     |      |
